# Supplementary material for: Extending Engagement with Life: Bidirectional Relations Between Lifelong Learning and Awareness of Age-Related Changes in Older Japanese Adults
Source: Research Square preprint supplement (doi:10.21203/rs.3.rs-8317865/v1), 2025-12-22
Supplement: Supplementary file 1 [file 4ed67a6c2539074d0e6903a4.docx]

Electronic Supplementary Material

Online Resource 1: Dropout sample

Table S1. Demographic variables of the dropout sample

Note. AARC: the awareness of age-related change, IADL: Instrumental Activities of Daily Living

Online Resource 2: Measurement invariance

Table S2. Measurement invariance of a cross-lagged effects model across age groups.

Note. 1Equality constraints across all three age groups of 70–79, 80–84, 85+ years.

Online Resource 3: Measurement details

**AARC-10 SF**

INSTRUCTIONS: This questionnaire contains statements on how a person may feel about getting older. We are interested in how YOU feel about getting older and what you can tell us about your own experiences. We are mostly interested in whether certain experiences apply to you and to what extent you can relate to them given that you may have experienced them yourself as the years have passed.

Please read each statement carefully and answer in the following way:

(Not at all, A little bit, Moderately, Quite a bit, Very much)

With my increasing age, I realize that …

1. I appreciate relationships and people much more.

2. My mental capacity is declining.

3. I pay more attention to my health.

4. I have to limit my activities.

5. I have more experience and knowledge to evaluate things and people.

6. I have less energy.

7. I have a better sense of what is important to me.

8. I feel more dependent on the help of others.

9. I have more freedom to live my days the way I want.

10. I find it harder to motivate myself.

**Lifelong Learning.** The survey, administered by the Cabinet Office in July 2022, consisted of 11 items assessing the status of lifelong learning over the past six months, with participants indicating activities pursued at least once a month:

1. Knowledge and skills necessary for my job

2. Knowledge and skills related to PC (Internet)

3. Knowledge and skills necessary for volunteer activities

4. Experiential activities such as nature experience and life experience

5. Social issues such as population decline and global warming

6. Health and sports

7. Matters related to family life, such as cooking and sewing

8. Childcare and education

9. Hobbies such as music, art, and recreational activities

10. Culture, such as literature, history, languages, etc.

11. Other

12. Not studied (0)

**Instrumental Activities of Daily Living (IADL).** We utilized five items from the Tokyo Metropolitan Institute of Gerontology (TMIG) Index of Competence, originally developed by Koyano et al. (1987) in Japanese and later validated in English by Koyano et al. (1991). IADLs refer to activities that enable individuals to live independently within a community. While not essential for basic functioning, proficiency in IADLs can significantly enhance the overall quality of life.

Please answer “yes” or “no” to the following questions:

1) Can you go out alone by bus or train?

2) Can you shop for daily necessities?

3) Can you prepare meals by yourself?

4) Can you pay bills?

5) Can you deposit and withdraw money from bank and postal savings accounts by yourself?

**The International Physical Activity Questionnaires (IPAQ) Short Form.** This measure evaluates the types and intensity of physical activity that individuals engage in as a part of their daily routines, providing an estimate of total physical activity in MET-minutes per week.

・Total physical activity MET-minutes/week = sum of Walking + Moderate + Vigorous MET-minutes/week scores

・Walking MET-minutes/week = 3.3 * walking minutes * walking days

・Moderate MET-minutes/week = 4.0 * moderate-intensity activity minutes * moderate days

・Vigorous MET-minutes/week = 8.0 * vigorous-intensity activity minutes * vigorous-intensity days

・All cases in which the sum total of Walking, Moderate, and Vigorous time variables exceeds 960 were deleted.

・In the IPAQ Short Form, it is recommended that all Walking, Moderate, and Vigorous time variables exceeding 3 hours or 180 minutes are truncated (re-coded) to be equal to 180 minutes in a new variable.

**Healthy Status (Time 2).** Please answer “yes” or “no” to the following questions:

1) Have you ever received a diagnosis of a joint disease (such as arthritis or rheumatism) from a doctor or through a medical checkup?

2) Have you ever received a diagnosis of stroke or cerebrovascular disease from a doctor or through a medical checkup?

3) Have you ever received a diagnosis of a neurological disease (such as Parkinson's disease or multiple sclerosis) from a physician or during a medical checkup?

4) Have you ever received a diagnosis of a heart disease (such as angina pectoris, heart failure, myocardial infarction, or valvular disease) from a doctor or through a medical checkup?

5) Have you ever received a diagnosis of diabetes from a doctor or through a medical checkup?

6) Have you ever received a diagnosis of chronic lung disease (such as chronic bronchitis or emphysema) from a doctor or during a medical checkup?
